# Supplementary material for: Templated growth of FASnI3 crystals for efficient tin perovskite solar cells
Source: Royal Society of Chemistry journal article supplement (doi:10.1039/d0ee01845g), 2020-01-01
Supplement: d0ee01845g1.pdf [file d0ee01845g1.pdf]

## Supporting Information

### Templated Growth of FASnI<sub>3</sub> Crystals for Efficient Tin Perovskite Solar Cell

Xiao Liu<sup>a,b,d</sup>, Tianhao Wu<sup>a</sup>, Jung-Yao Chen<sup>c</sup>, Xiangyue Meng<sup>d</sup>, Xin He<sup>d</sup>, Takeshi Noda<sup>d</sup>, Han Chen<sup>a</sup>, Xudong Yang<sup>a</sup>, Hiroshi Segawa<sup>e</sup>, Yanbo Wang<sup>a\*</sup>, Liyuan Han<sup>a,b,d,f\*</sup>

<sup>a</sup>State Key Laboratory of Metal Matrix Composites, Shanghai Jiao Tong University, 800 Dong Chuan Road, Shanghai 200240, China.

<sup>b</sup>Special Division of Environmental and Energy Science, Komaba Organization for Educational Excellence (KOMEX), College of Arts and Sciences, University of Tokyo, Tokyo 153-8902, Japan

<sup>c</sup>Department of Chemical Engineering, National Chung Cheng University, Chiayi, 62102, Taiwan

<sup>d</sup>Photovoltaic Materials Group, Center for Green Research on Energy and Environmental Materials, National Institute for Materials Science, Tsukuba, Ibaraki 305-0047, Japan.

<sup>e</sup>Research Center for Advanced Science and Technology, University of Tokyo, Tokyo 153-8904, Japan

<sup>f</sup>Faculty of Pure and Applied Science, University of Tsukuba, Tsukuba, Ibaraki 305-8571, Japan

\*Corresponding author. E-mail address: sjtu-wyb@sjtu.edu.cn; han.liyuan@sjtu.edu.cn

## Materials

The following chemicals were used as received from commercial sources, including SnI<sub>2</sub> (99.99%, Sigma-Aldrich), CH(NH<sub>2</sub>)<sub>2</sub>I (FAI) (>98%, Tokyo Chemical Industry Co., Japan), CH<sub>3</sub>(CH<sub>2</sub>)<sub>2</sub>NH<sub>3</sub>I (PAI) (>99%, Sigma-Aldrich), SnF<sub>2</sub>(>99%, Sigma-Aldrich), C<sub>60</sub> (99.5%, Sigma-Aldrich), bathocuproine (>99%, Wako), All solutions were filtered with a 0.2  $\mu$ m PTFE filter before using.

## Solar cell fabrication

Patterned ITO glass substrates were cleaned in the order of detergent, deionized water, acetone, and isopropanol for 15 min by ultra-sonicated. Then, the cleaned ITO substrates were treated by ultraviolet-ozone for 30 min before the deposition of PEDOT:PSS layer. The perovskite precursor solution composed of 1 M SnI<sub>2</sub>, 1 M FAI and 0.1M SnF<sub>2</sub> in DMSO was stirred for 2 hours at room temperature.

The perovskite solar cells were fabricated according to our previous work.<sup>1</sup> In short, perovskite films were spin-coated on the PEDOT:PSS layer at 1000 rpm for 12 s and 5000 rpm for 48 s in the glove box. 80  $\mu$ L Chlorobenzene was in-situ dripped onto the perovskite film during the second step at 30 s. In order to construct the templated growth structure, the PAI (1-5 mg/mL) dissolved in a mixed solvent of CF and DMSO (100:0.5-2 v/v) were spin-coated on perovskite films at the speed of 2000-6000 rpm. Then the perovskite films were annealed at 60 °C for 10 s and 100 °C for 12 min. Finally, 50 nm C<sub>60</sub> and 8 nm BCP and 70 nm Ag electrode were evaporated under high vacuum ( $< 2 \times 10^{-7}$  Torr). The device areas were defined by a mask with

an aperture area of 0.10 cm<sup>2</sup>. For the control of oxygen concentration, an accurate oxygen volume was injected into the glovebox.<sup>2</sup>

### **Characterization:**

The XRD and rocking curves were measured by Rigaku Smart lab thin-film x-ray diffractometer using Cu  $K_\alpha$  radiation. The SEM image were measure by HITACHI-SU8000 field-emission scanning electron microscope. The UV-vis spectra were obtained by a Shimadzu UV/vis 3600 spectrophotometer. The XPS spectra were measured by PHI Quantera SXM (ULVAC-PHI) with X-ray source of Al  $K_\alpha$  (mono), the incident angle and take-off angle are 90 ° and 45 °, respectively. The steady state PL and TRPL were measured with a Hamamatsu C12132 fluorescence lifetime spectrometer using a laser at an excitation wavelength of  $\lambda=402$  nm. The  $C-V$  measurements and the TPV were measured by a platform for all-in-one characterization of solar cells and OLED (PAIOS) of FLUXim Company.  $C-V$  measurements were taken at 1 kHz with voltage amplitude of 10 mV under dark at room temperature. TPV were measured at open-circuit condition, the pulse length of a white light is 1 ms, background light of 0.09 Sun (9 mW cm<sup>-2</sup>) was applied.

The  $I-V$  curves were measured under forward scan (-0.1 V to 0.8 V ) or reverse scan (0.8 V to -0.1 V) by a fixed step voltage of 10 mV and delay time of 50 ms by a solar simulator with standard AM 1.5G sunlight (100 mW cm<sup>-2</sup>, WXS-155S-10, Wacom Denso) according to our previous report.<sup>3,4</sup> The aperture area was defined by a mask of 0.09 cm<sup>2</sup>, Monochromatic IPCE spectra were measured by a

monochromatic incident light of  $1 \times 10^{16}$  photons  $\text{cm}^{-2}$  in director current mode (CEP-2000BX, Bunko-Keiki). The light intensity of the solar simulator was calibrated by a standard silicon solar cell. The solar cells were firstly encapsulated in nitrogen filled glovebox by cavity glass and UV-curable glue. All the cells were encapsulated according to our previous reports for operation stability test<sup>5</sup>.

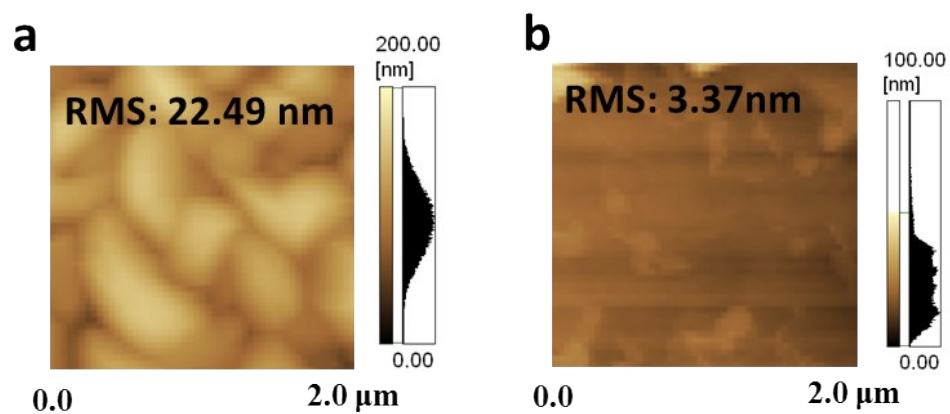

**Figure S1.** AFM images of (a) FASnI<sub>3</sub> and (b) TG-FASnI<sub>3</sub> films.

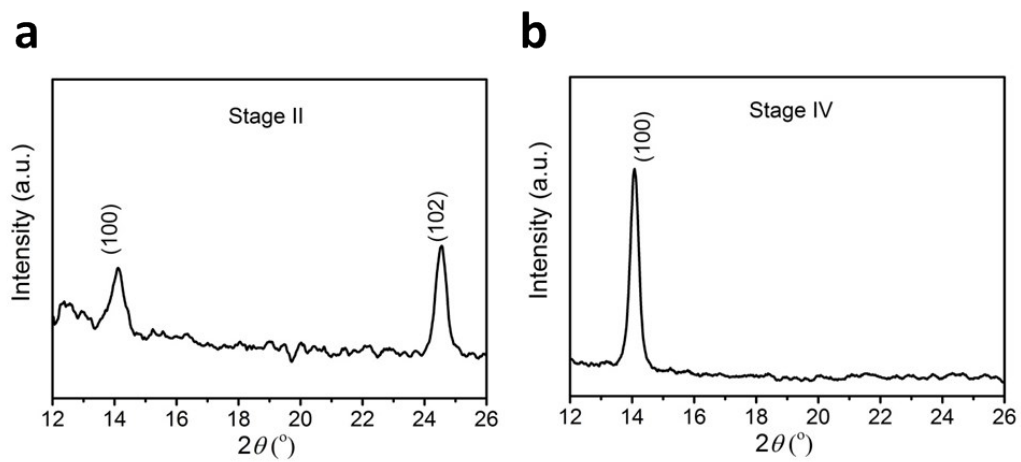

**Figure S2.** The GIXRD patterns for the tin perovskites in Fig. 1a stage II the treatment of PAI) and stage IV (after the treatment of PAI) with the incident angle of  $0.2^{\circ}$ .

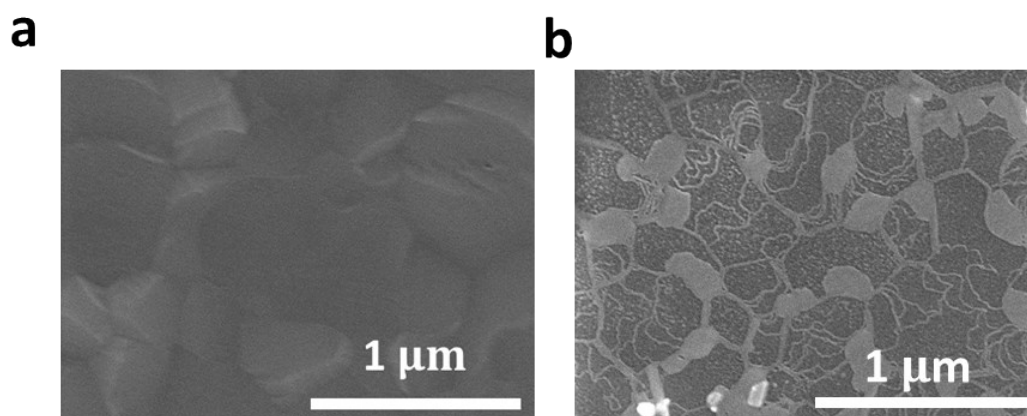

**Figure S3.** SEM images of (a) 1 mg mL<sup>-1</sup> PAI and (b) 5mg mL<sup>-1</sup> PAI treated TG-FASnI<sub>3</sub> films.

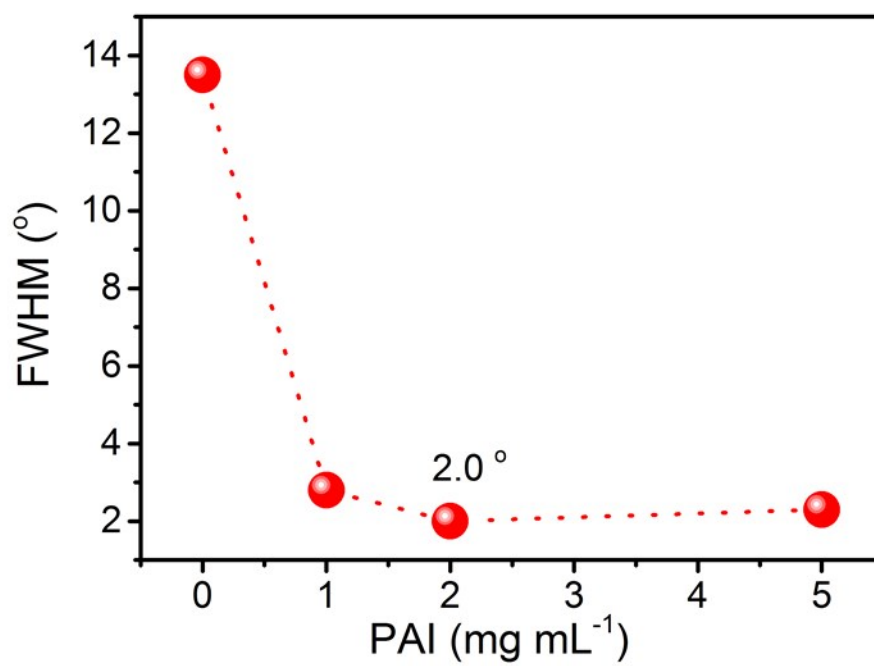

**Figure S4.** FWHM of the rocking curve XRD for FASnI<sub>3</sub> film and 1 mg mL<sup>-1</sup>, 2 mg mL<sup>-1</sup> and 5 mg mL<sup>-1</sup> PAI treated TG-FASnI<sub>3</sub> films.



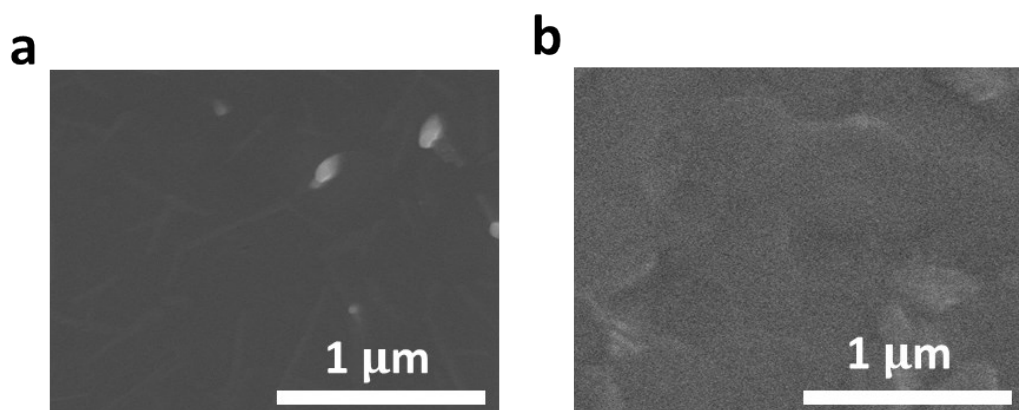

**Figure S5.** SEM images of 2 mg mL<sup>-1</sup> PAI treated TG-FASnI<sub>3</sub> with (a) 2000 rpm/s and (b) 6000 rpm/s.

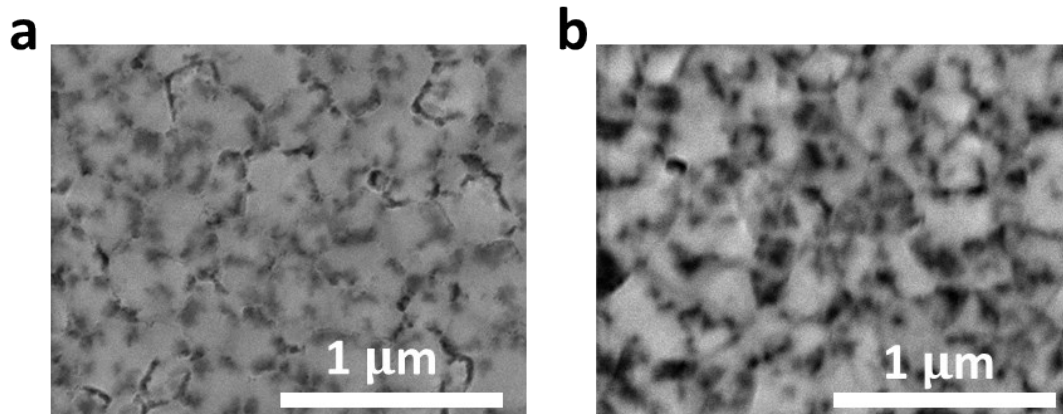

**Figure S6.** SEM images of 2 mg mL<sup>-1</sup> PAI treated TG-FASnI<sub>3</sub> with the PAI dissolved in (a) CF/DMSO (100:0.5 v/v), (b) CF/DMSO (100:2 v/v).

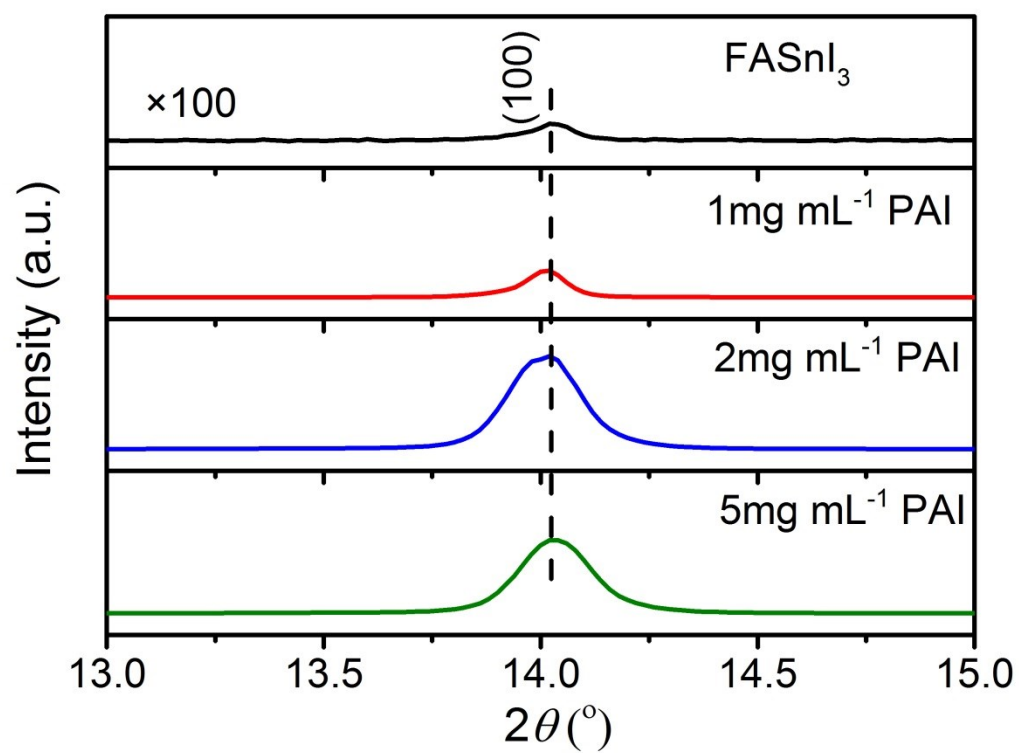

**Figure S7.** Amplified the signals of XRD (100) peak of  $\text{FASnI}_3$ ,  $1\text{ mg mL}^{-1}$ ,  $2\text{ mg mL}^{-1}$  and  $5\text{ mg mL}^{-1}$  PAI treated TG- $\text{FASnI}_3$ .

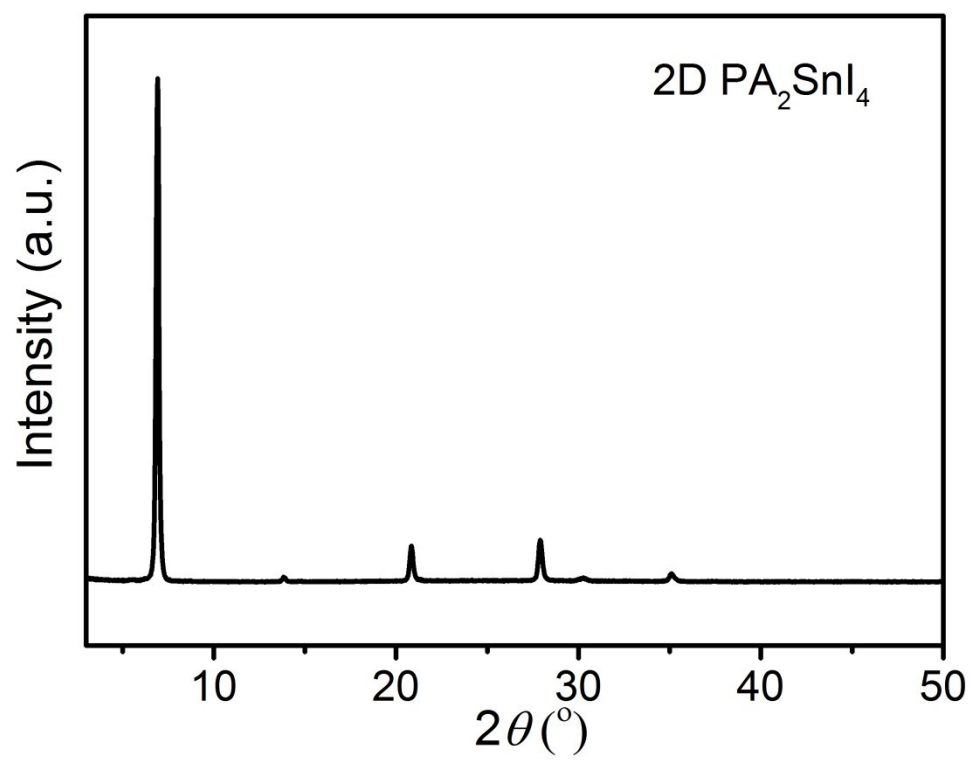

**Figure S8.** XRD pattern of pure 2D PA<sub>2</sub>SnI<sub>4</sub>.

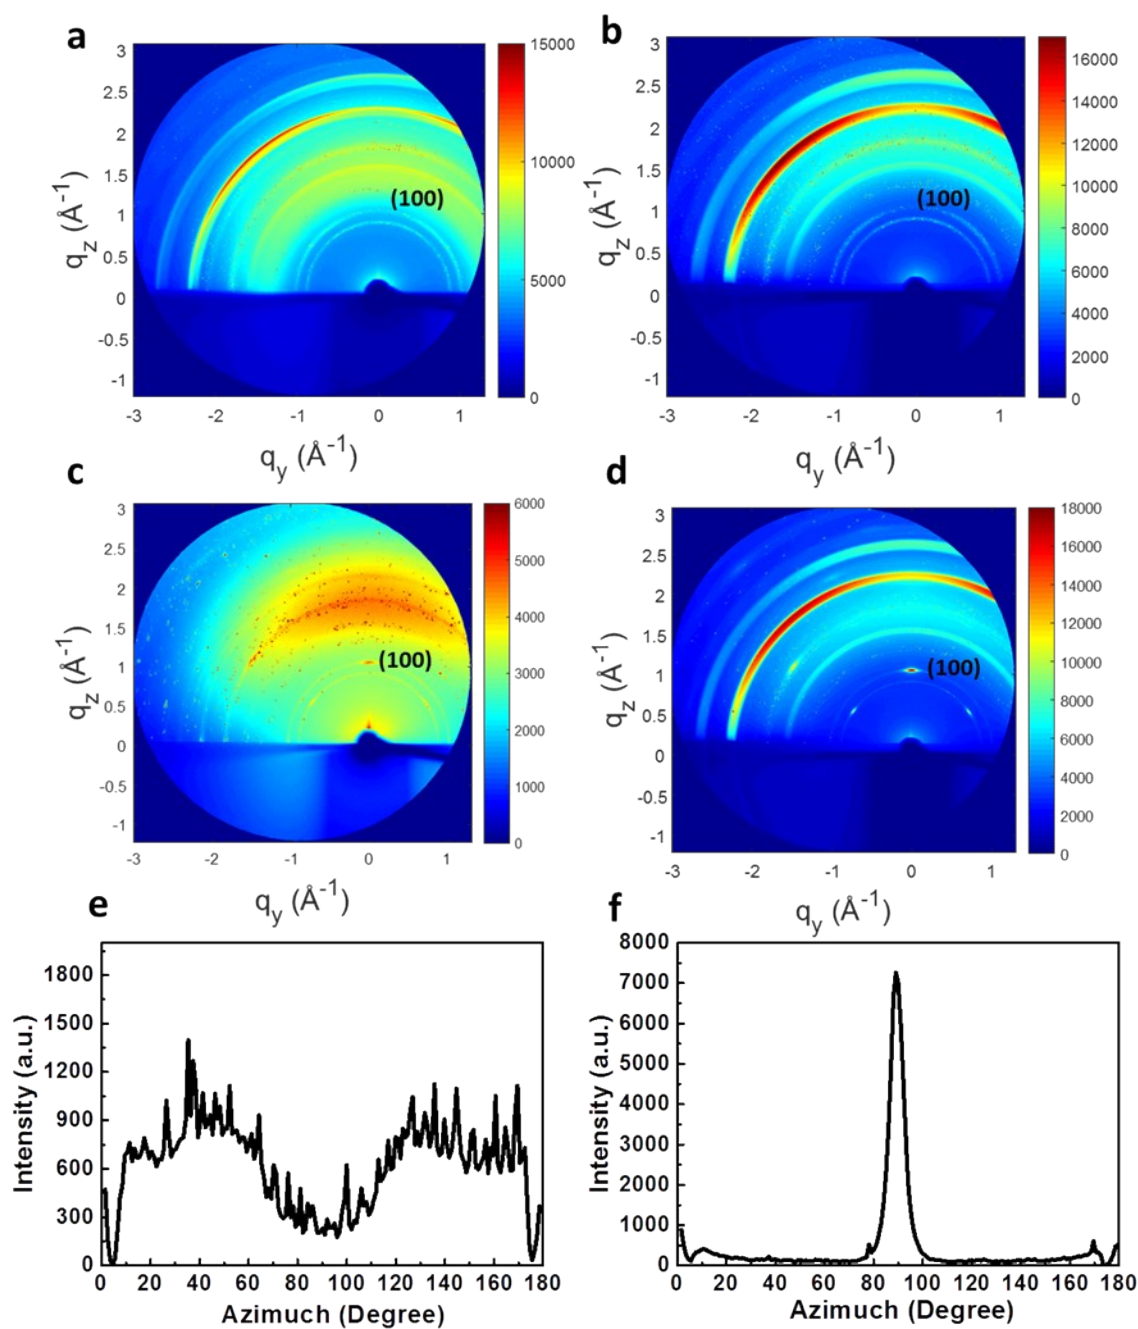

**Figure S9.** (a) GIWAXS images of FASnI<sub>3</sub> and (b) TG-FASnI<sub>3</sub> with incident angle of 0.1° and (c) GIWAXS image of FASnI<sub>3</sub> and (d) TG-FASnI<sub>3</sub> with incident angle of 1°, (e) Azimuthal degree pattern of  $q \approx 1 \text{ \AA}^{-1}$  in (b) and (f) Azimuthal degree pattern of  $q \approx 1 \text{ \AA}^{-1}$  in (d).

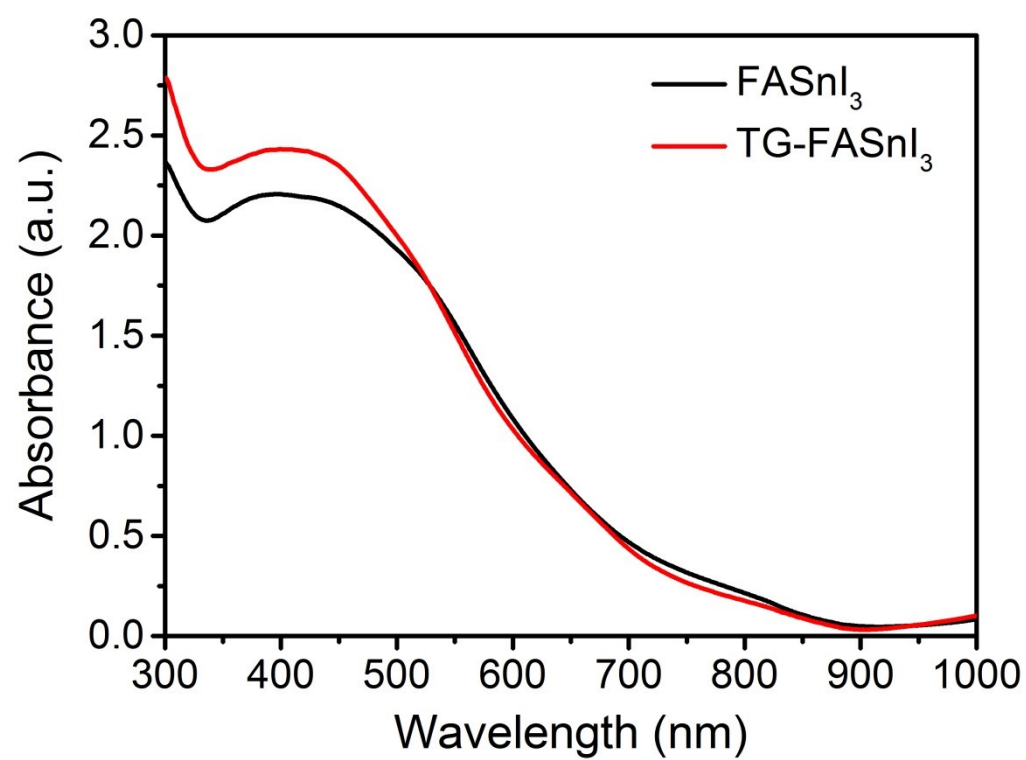

**Figure S10.** UV-vis spectrum of FASnI<sub>3</sub> and TG-FASnI<sub>3</sub>.



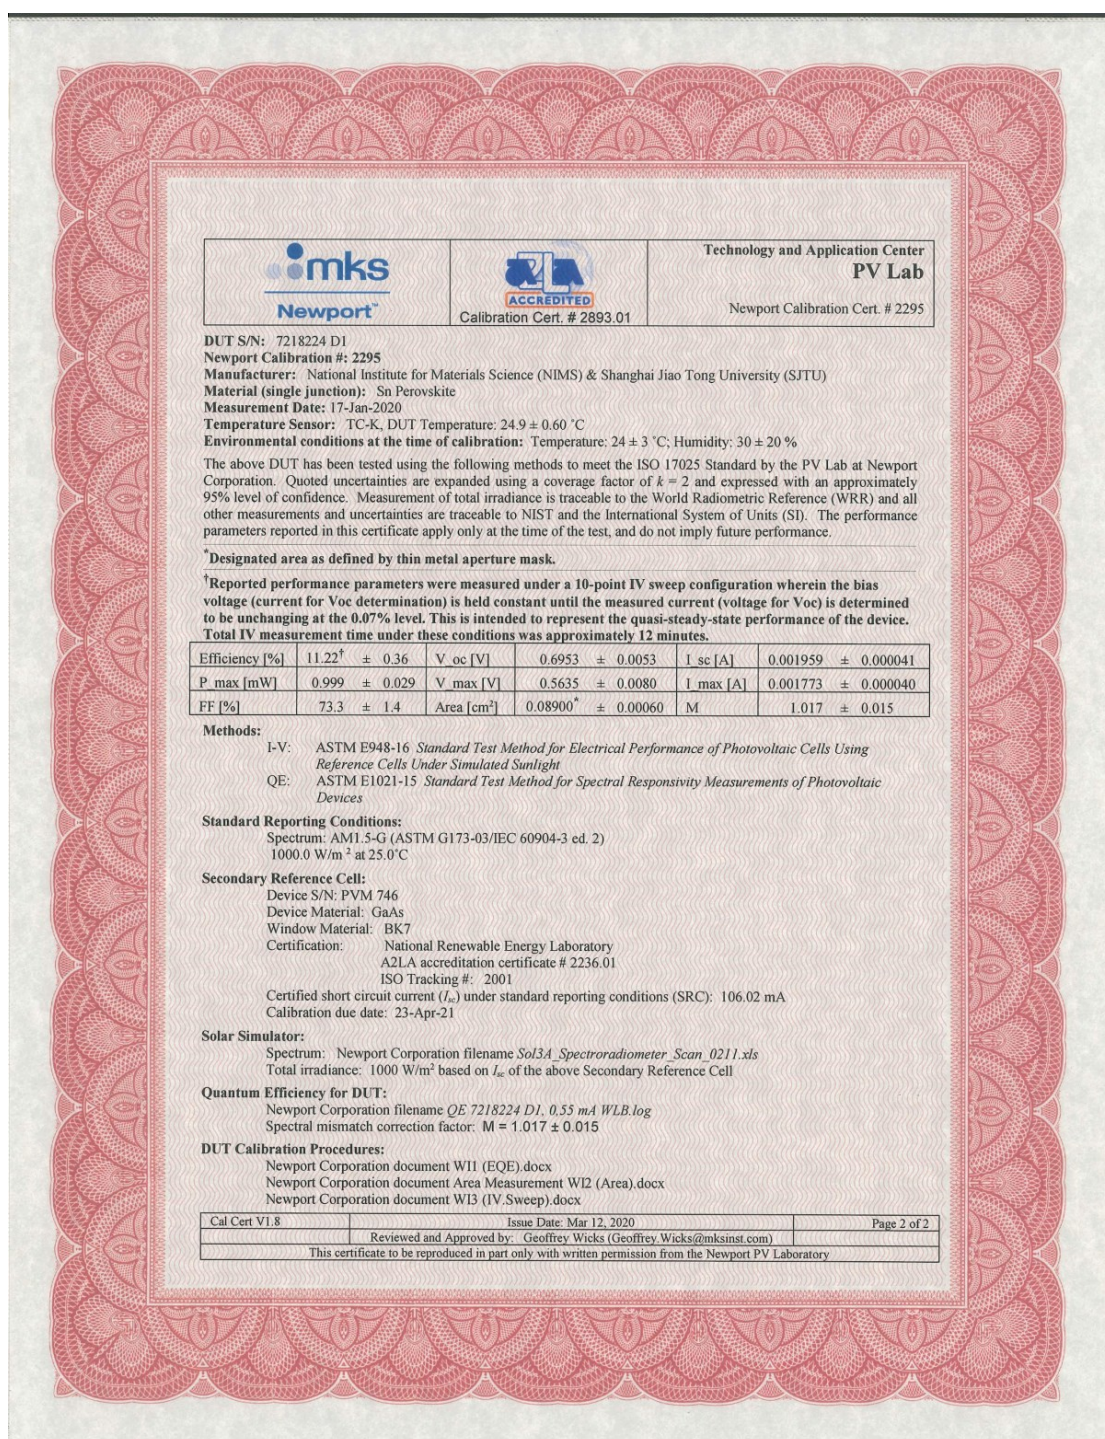

**Figure S11.** The certified results of a typical TG-FASnI<sub>3</sub> TPSC obtained from an accredited test center (Newport, USA). A quasi-steady-state PCE of 11.22% was obtained on an aperture area of 0.08900 cm<sup>2</sup>.

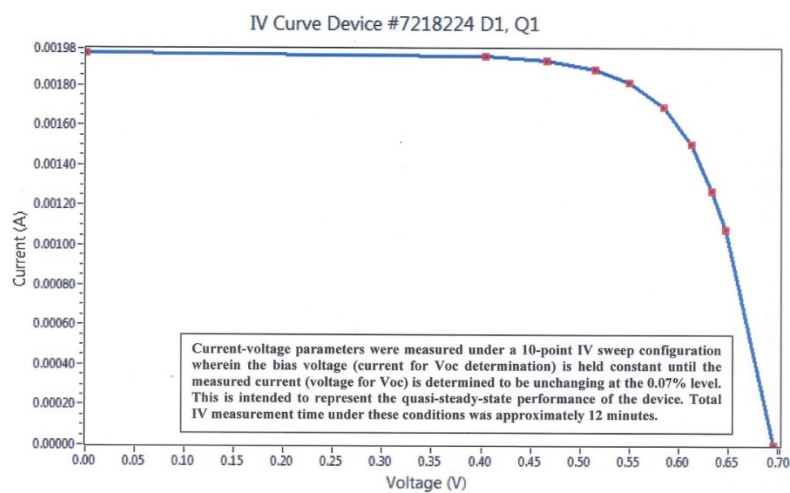

|                    |                                                                        |             |
|--------------------|------------------------------------------------------------------------|-------------|
| Cal Cert Data V1_2 | Issue Date: Mar 12, 2020                                               | Page 1 of 3 |
|                    | Reviewed and Approved by: Geoffrey Wicks<br>Geoffrey.Wicks@mksinst.com |             |

**Figure S12.** Certified results of  $I$ - $V$  curve.



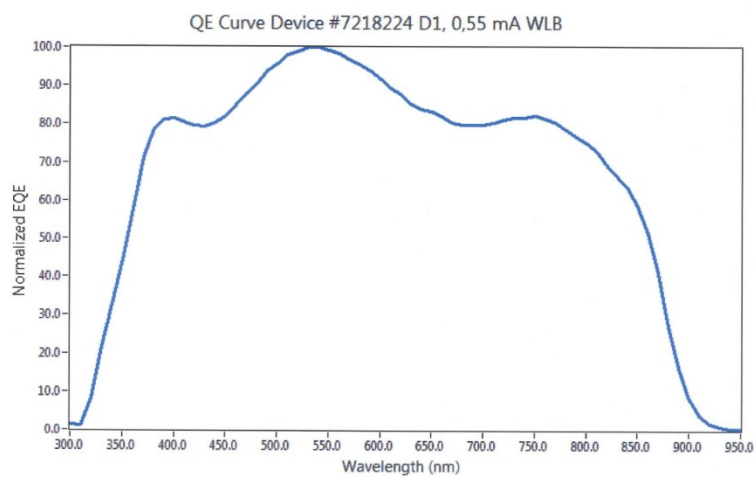

|                    |                                                                        |             |
|--------------------|------------------------------------------------------------------------|-------------|
| Cal Cert Data V1_2 | Issue Date: Mar 12, 2020                                               | Page 2 of 3 |
|                    | Reviewed and Approved by: Geoffrey Wicks<br>Geoffrey.Wicks@mksinst.com |             |

**Figure S13.** Certified results of normalized external quantum efficiency.

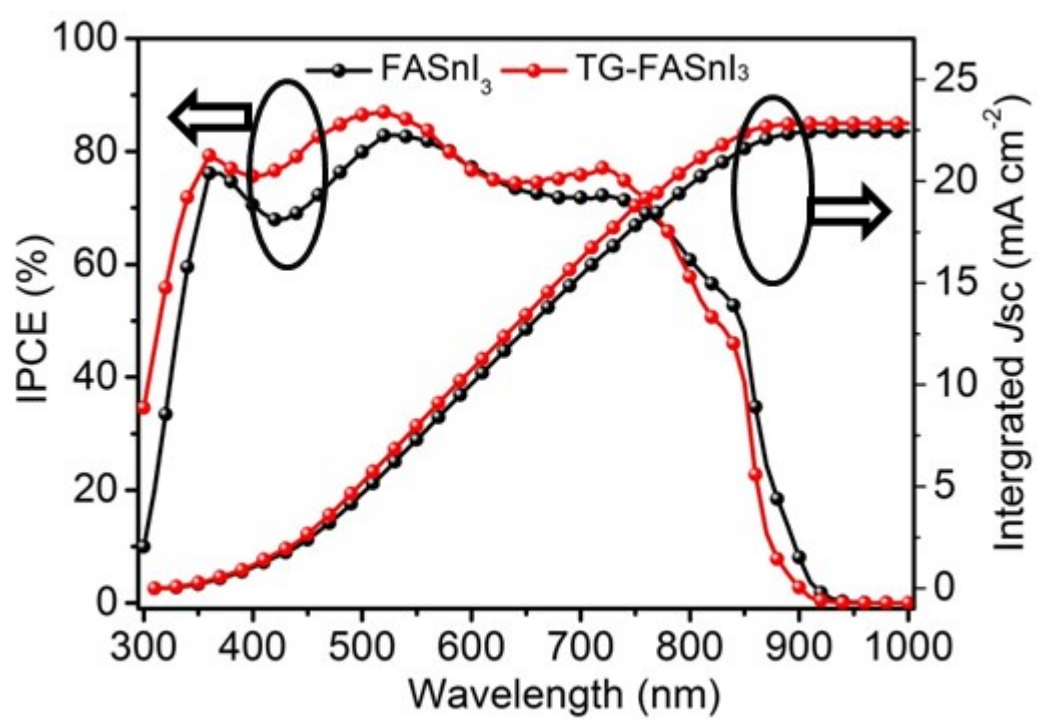

**Figure S14.** IPCE of the of  $\text{FASnI}_3$  and  $\text{TG-FASnI}_3$  devices.

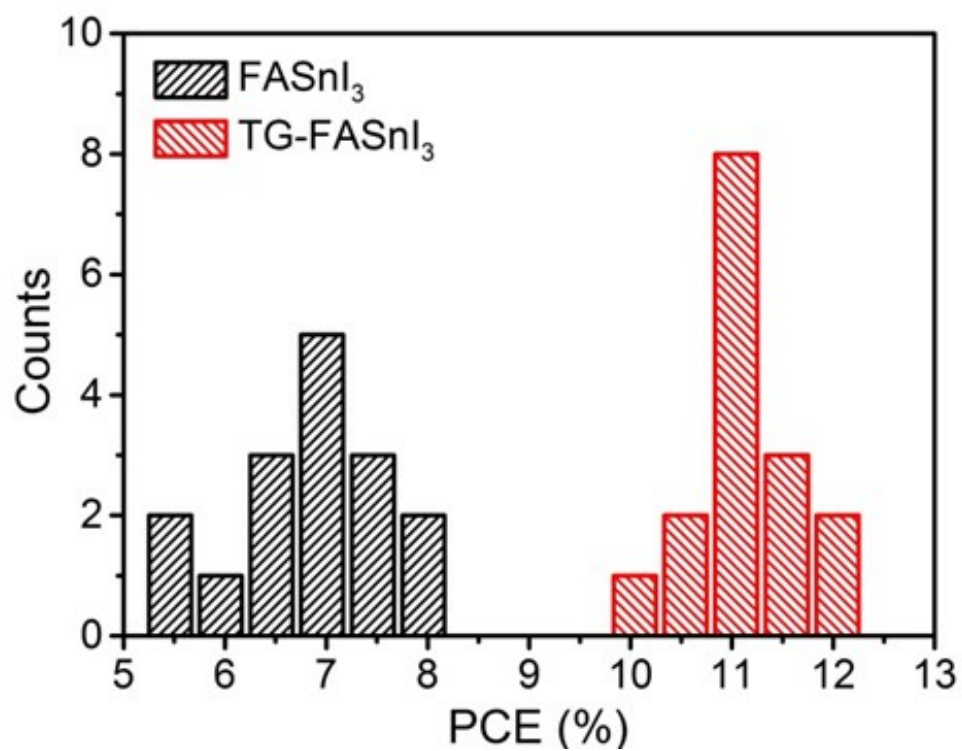

**Figure S15.** Histogram of efficiency statistics of sixteen devices of FASnI<sub>3</sub> and TG-FASnI<sub>3</sub> devices.

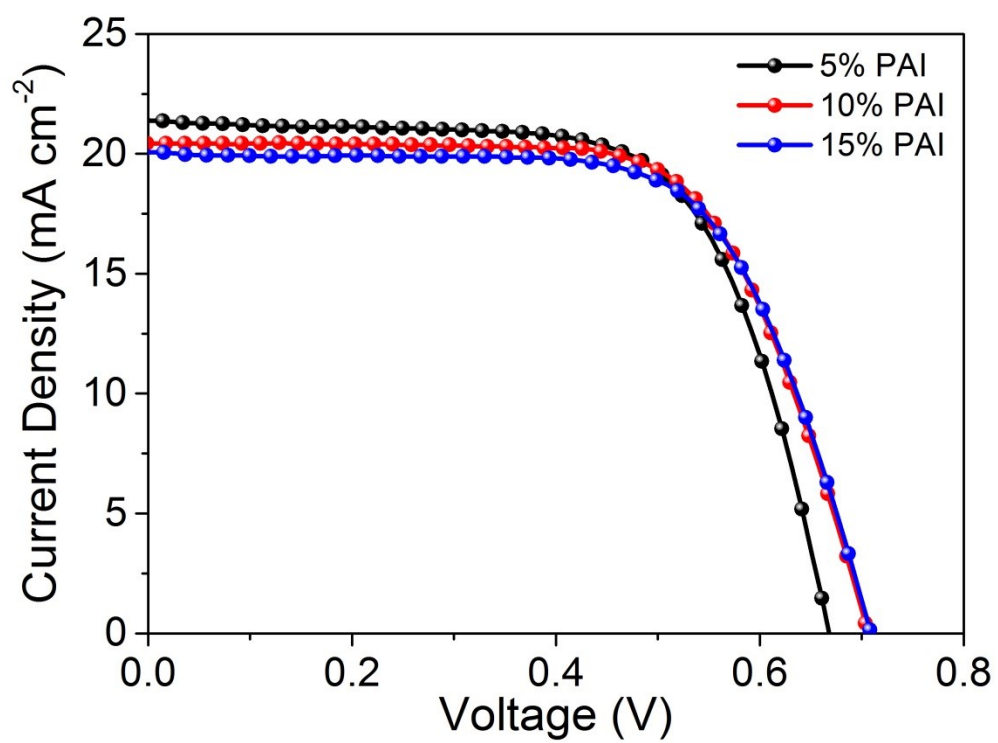

**Figure S16.** *I-V* curve of FASnI<sub>3</sub> with PAI as additives in precursor solution

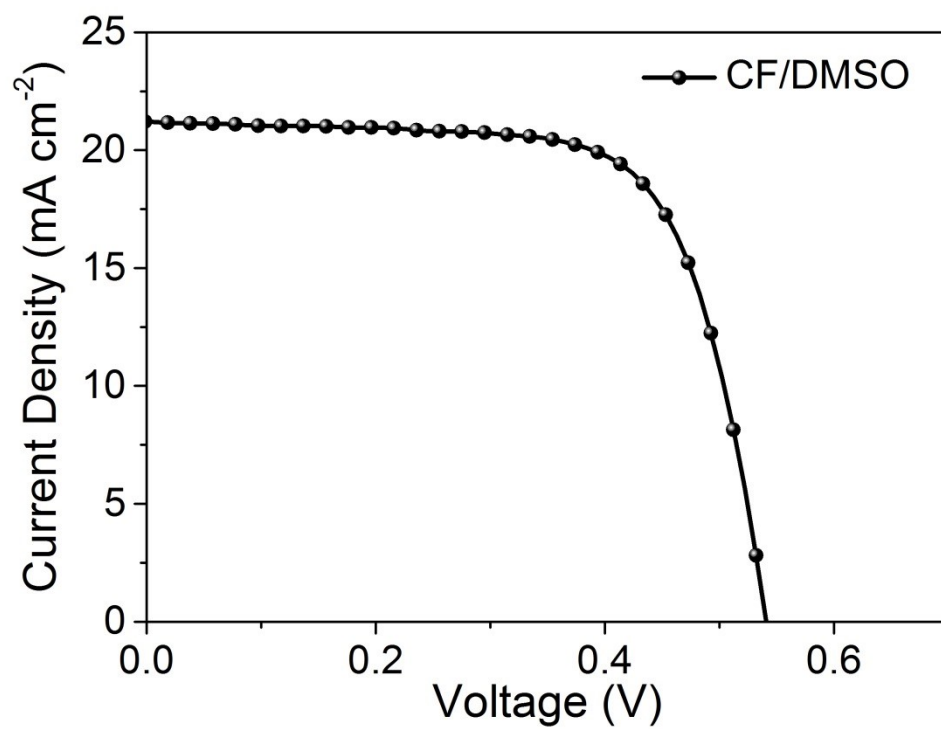

**Figure S17.** *I-V* curve of FASnI<sub>3</sub> with CF/DMSO pretreatment

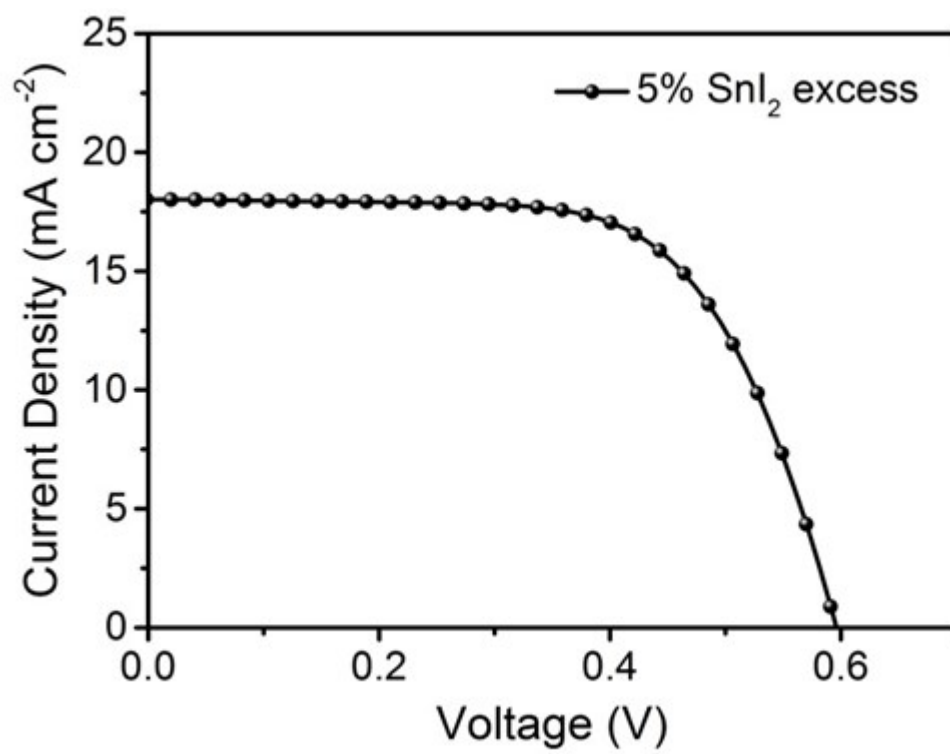

**Figure S18** I-V curve of 5%  $\text{SnI}_2$  excess  $\text{FASnI}_3$  with PAI pretreatment

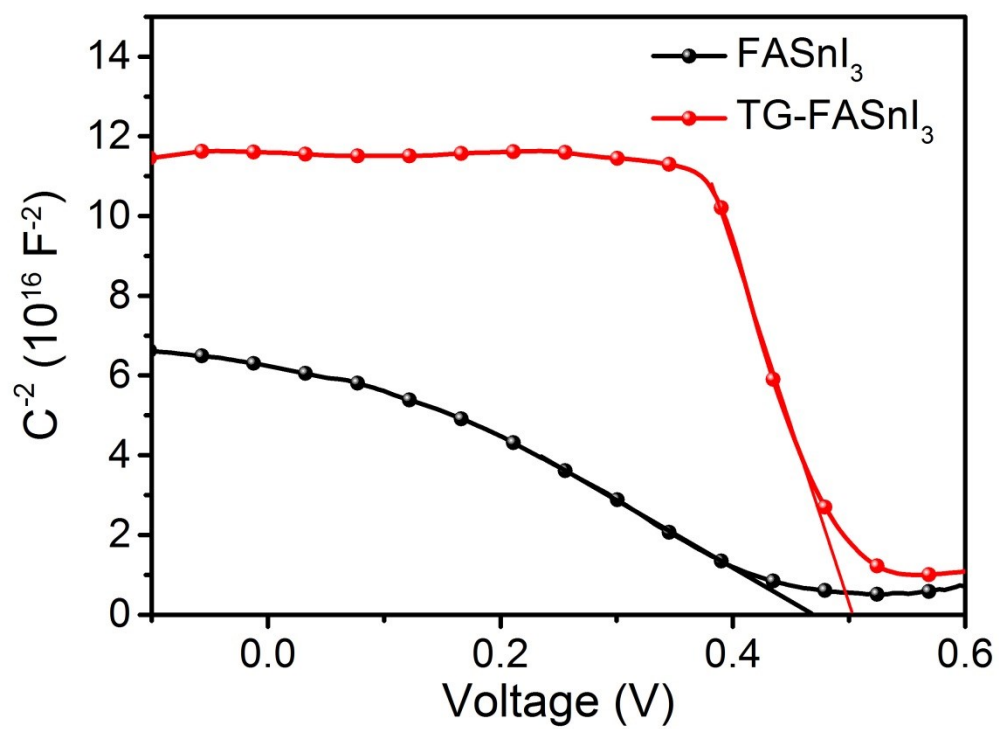

**Figure S19.**  $C$ - $V$  curves of FASnI<sub>3</sub> and TG-FASnI<sub>3</sub> devices.

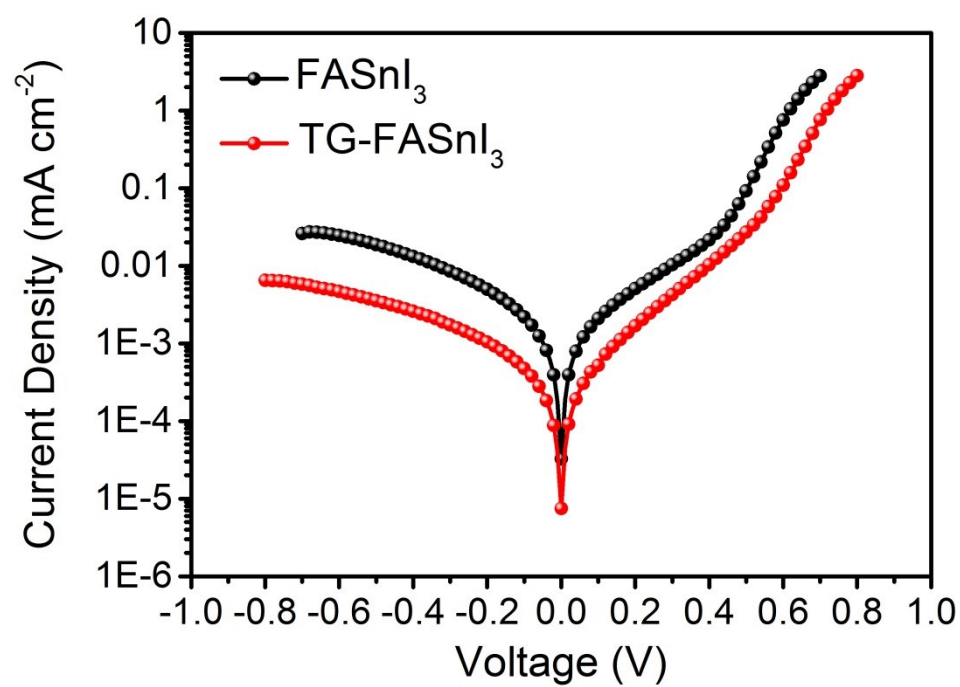

**Figure S20.** Dark current densities of FASnI<sub>3</sub> and TG-FASnI<sub>3</sub> devices.



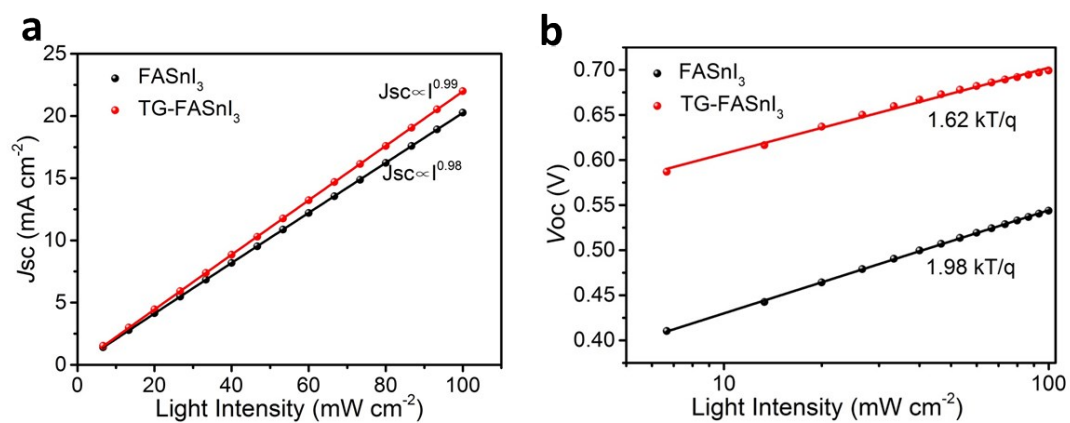

**Figure S21.**  $J_{sc}$  and  $V_{oc}$  versus illumination intensity of FASnI<sub>3</sub> and TG-FASnI<sub>3</sub> devices.

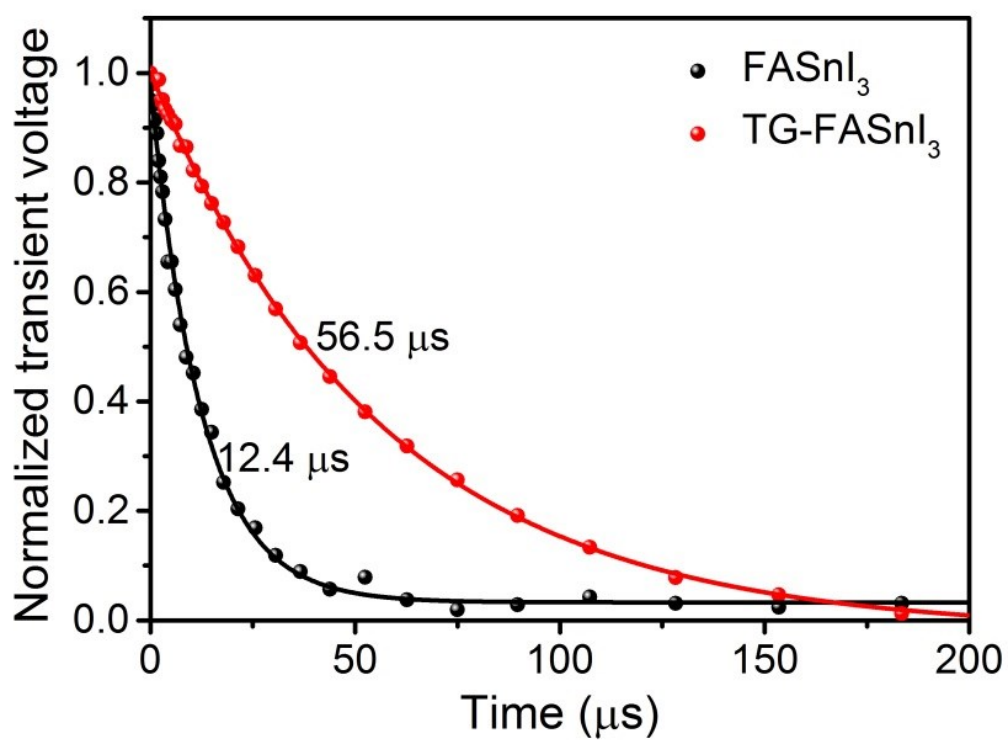

**Figure S22.** TPV of FASnI<sub>3</sub> and TG-FASnI<sub>3</sub> devices.

**Table S1:** Device parameter for typical FASnI<sub>3</sub> and TG-FASnI<sub>3</sub> based TPSCs.

| Perovskite            | Scan direction | $J_{SC}$ (mA cm <sup>-2</sup> ) | $V_{OC}$ (V) | FF (%) | PCE (%) |
|-----------------------|----------------|---------------------------------|--------------|--------|---------|
| FASnI <sub>3</sub>    | Forward        | 21.97                           | 0.52         | 67.2   | 7.68    |
|                       | Reverse        | 22.11                           | 0.53         | 67.6   | 7.93    |
| TG-FASnI <sub>3</sub> | Forward        | 22.10                           | 0.72         | 73.0   | 11.62   |
|                       | Reverse        | 22.37                           | 0.73         | 72.0   | 11.78   |

## References

1. X. Liu, Y. Wang, F. Xie, X. Yang and L. Han, *ACS Energy Lett.*, 2018, **3**, 1116-1121.
2. X. He, T. Wu, X. Liu, Y. Wang, X. Meng, J. Wu, T. Noda, X. Yang, Y. Moritomo, H. Segawa and L. Han, *J. Mater. Chem. A*, 2020, **8**, 2760-2768.
3. Y. Wang, X. Liu, Z. Zhou, P. Ru, H. Chen, X. Yang and L. Han, *Adv. Mater.*, 2019, **31**, e1803231.
4. M. Yin, F. Xie, X. Li, Y. Wu, X. Yang, F. Ye, Y. Wang, J. He, W. Tang, E. Bi, H. Chen and L. Han, *Appl. Phys. Express*, 2017, **10**, 076601.
5. W. Chen, Y. Wu, Y. Yue, J. Liu, W. Zhang, X. Yang, H. Chen, E. Bi, I. Ashraful, M. Grätzel and L. Han, *Science*, 2015, **350**, 944-948.
